# Supplementary material
Source: PubMed Central journal article supplement (PMC5988195)
Supplement: iid-0002-0163-s01.pdf [file iid-0002-0163-s01.pdf]

**Supplementary Table 1:** Overview of the SEECs questionnaires and the parties responsible for their completion. The letters behind the questionnaires denote the language. All questionnaires completed by physicians or study nurses are in English (E), whereas questionnaires completed by patients are available in German (G), French (F), and English (E). Patient questionnaires assess symptom severity and EoE-specific quality of life and can be distributed every time the patient comes for a consultation. The patient questionnaires are also completed during the follow-up visits.

| <b>Questionnaire name</b>       | <b>Responsible for completion</b> |
|---------------------------------|-----------------------------------|
| Screening sheet (E)             | Physician                         |
| Enrollment (E)                  | Physician / Study nurse           |
| Patient questionnaire (G, F, E) | Patient                           |
| Biosample sheet                 | Physician / Study nurse           |
| Follow-up questionnaire (E)     | Physician / Study nurse           |
